# Supplementary material
Source: Springer Nature journal article supplement (https://www.springermedizin.de/resource/supplementary/12943_2014_1427_MOESM3_ESM.pdf/9552964)

a)

|             | SH-EP/FOXO3 | NB15/FOXO3 | CEM/FOXO3 |
|-------------|-------------|------------|-----------|
| 209183_s_at | 171.25      | 87.42      | 49.87     |

b)

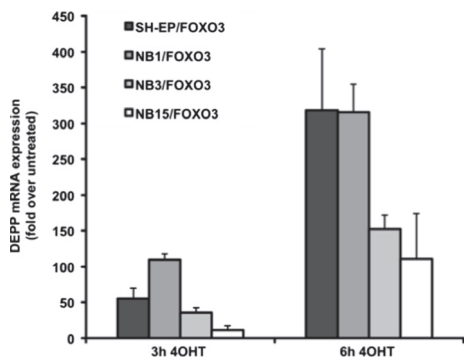

c)

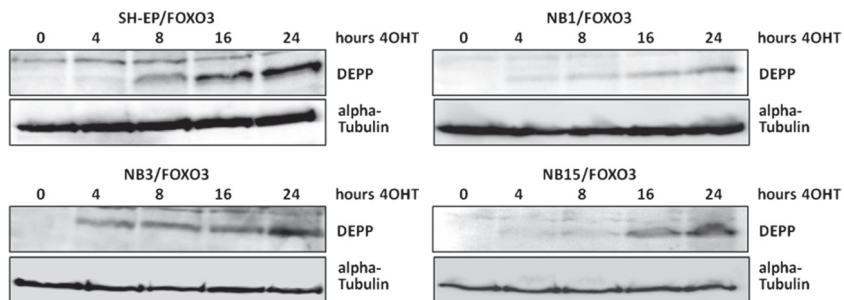

d)

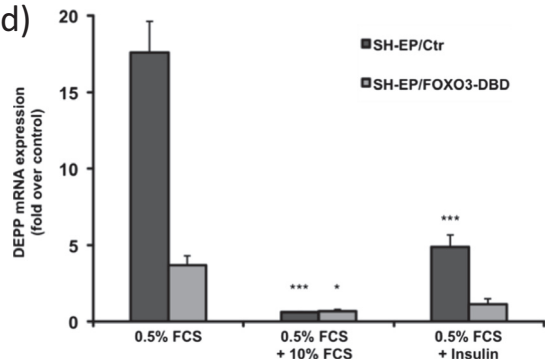

e)

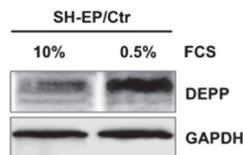

Supplement: MOESM3 [file 9552964]
